# Supplementary material
Source: HighWire-hosted journal article supplement (https://drc.bmj.com/content/6/1/e000510)
Supplement: inline-supplementary-material-1 [file inline-supplementary-material-1.docx]

Table 3a. Number of patients admitted under each specialty

|  |  |  |  |
| --- | --- | --- | --- |
| Admission specialty | Total | Inpatients without diabetes | Inpatients with diabetes |
| General Surgery | 2,948 | 2,526 | 422 |
| Urology | 1,174 | 973 | 201 |
| Breast surgery | 147 | 135 | 12 |
| Colorectal surgery | 369 | 307 | 62 |
| Hepatobiliary & pancreatic surgery | 279 | 238 | 41 |
| Upper GI surgery | 24 | 22 | 2 |
| Vascular surgery | 363 | 289 | 74 |
| Trauma and Orthopaedics | 4,329 | 3,855 | 474 |
| ENT | 284 | 246 | 38 |
| Opthalmology | 17 | 11 | 6 |
| Oral Surgery | 98 | 83 | 15 |
| Maxillo-facial surgery | 6 | 6 | 0 |
| Plastic surgery | 17 | 13 | 4 |
| Cardiothoracic surgery | 6 | 6 | 0 |
| A&E | 65 | 58 | 7 |
| Pain management | 4 | 4 | 0 |
| Critical care medicine | 146 | 107 | 39 |
| General medicine | 15,023 | 11,847 | 3,176 |
| Gastroenterology | 669 | 525 | 144 |
| Endocrinology | 20 | 16 | 4 |
| Clinical haemotology | 171 | 162 | 9 |
| Diabetic medicine | 47 | 9 | 38 |
| Cardiology | 265 | 206 | 59 |
| Dermatology | 5 | 5 |  |
| Respiratory medicine | 82 | 68 | 14 |
| Nephrology | 214 | 164 | 50 |
| Neurology | 95 | 86 | 9 |
| Rheumatology | 33 | 30 | 3 |
| Geriatric medicine | 104 | 79 | 25 |
| Gynaecology | 526 | 503 | 23 |
| Gynaecological oncology | 400 | 369 | 31 |
| Clinical oncology | 709 | 651 | 58 |
| Missing | 3 | 0 | 3 |
| Total | 28,642 | 23,599 | 5,043 |

Table 3b. Reason for admission

| Main reason for admission | Total | Inpatients without diabetes | Inpatients with diabetes |
| --- | --- | --- | --- |
| Infectious and parasitic diseases | 362 | 284 | 78 |
| Neoplasms | 2,899 | 2,530 | 369 |
| Diseases of the blood and blood-forming organs and certain disorders involving the immune mechanism | 670 | 564 | 106 |
| Endocrine, nutritional and metabolic diseases | 674 | 247 | 427 |
| Mental, Behavioural and Neurodevelopmental disorders | 270 | 228 | 42 |
| Diseases of the nervous system | 674 | 569 | 105 |
| Diseases of the eye, adnexa, ear and mastoid process | 69 | 58 | 11 |
| Diseases of the circulatory system | 5,094 | 4,013 | 1,081 |
| Diseases of the respiratory system | 2,815 | 2,342 | 473 |
| Diseases of the digestive system | 3,095 | 2,589 | 506 |
| Diseases of the skin and subcutaneous tissue | 422 | 353 | 69 |
| Diseases of the musculoskeletal system and connective tissue | 2,827 | 2,505 | 322 |
| Diseases of the genitourinary system | 2,174 | 1,801 | 373 |
| Congenital malformations, deformations and chromosomal abnormalities | 12 | 11 | 1 |
| Symptoms, signs and abnormal clinical and laboratory findings, not elsewhere classified | 3,343 | 2,707 | 636 |
| Injury, poisoning and certain other consequences of external causes | 2,304 | 1,995 | 309 |
| External causes of morbidity | 731 | 621 | 110 |
| Factors influencing health status and contact with health services | 207 | 182 | 25 |
| Total | 28,642 | 23,599 | 5,043 |
